# Supplementary material for: Assessment of Patient Knowledge and Perceptions of Pharmacogenomics Before and After Using a Mock Results Patient Web Portal
Source: PubMed Central journal article supplement — Clin Transl Sci. 2019 Sep 28;13(1):78–87. doi: 10.1111/cts.12681 (PMC6951853; doi:10.1111/cts.12681), 2019-09-28
Supplement: CTS-13-78-s002.pdf [file CTS-13-78-s002.pdf]

## Supplementary Materials

### Pre-Test Questionnaire

Q#: \_\_\_\_\_

Year of birth: \_\_\_\_\_

1. Factors that can affect how a person responds to a medication include:
  - a. Age
  - b. Sex
  - c. Lifestyle
  - d. Genetics
  - e. Other drugs
  - f. All of the above
  - g. I don't know
  
2. Your DNA is passed down from:
  - a. Your mother
  - b. Your father
  - c. Both your mother and your father
  - d. Neither your mother nor your father
  - e. I don't know
  
3. Your DNA contains instructions for:
  - a. The color of your eyes
  - b. Your blood type
  - c. How you respond to medications
  - d. All of the above
  - e. I don't know
  
4. Pharmacogenomics is the study of:
  - a. Drug side effects
  - b. How your DNA affect your responses to medications
  - c. How medications can change your DNA
  - d. How drugs are prescribed
  - e. I don't know
  
5. Pharmacogenomic testing can:
  - a. Help find the most effective medication
  - b. Help avoid side effects
  - c. Help find the best dose of a medication
  - d. All of the above
  - e. I don't know

6. It is important that I can control who has access to my genetic information
    - a. Strongly agree
    - b. Agree
    - c. Neutral
    - d. Disagree
    - e. Strongly disagree
  
  7. If I have access to my pharmacogenomic test results, I would share my results with (**circle all that apply**):
    - a. Healthcare provider
    - b. Pharmacist
    - c. Spouse/partner
    - d. Parents
    - e. Siblings
    - f. Children
    - g. Friends
    - h. Social media
    - i. Others (please specify):
    - j. I would not share my results
  
  8. If I have access to my pharmacogenomic test results, I would encourage a friend or family member to consider getting pharmacogenomic testing:
    - a. Strongly agree
    - b. Agree
    - c. Neutral
    - d. Disagree
    - e. Strongly disagree
- 

*The following case scenario applies to questions 9-10:*

**Imagine that you are a patient who got pharmacogenomic testing for an acid reflux medication, omeprazole.**

9. What could the pharmacogenomic test result tell you about this medication?
    - a. Whether I will experience nausea and vomiting when using omeprazole
    - b. Whether omeprazole will be an effective medication for me to treat acid reflux
    - c. Whether I will be allergic to omeprazole
    - d. Pharmacogenomic testing is irrelevant to omeprazole
    - e. I don't know
  
  10. Based on my current knowledge, I wish my doctor had pharmacogenomic information before prescribing omeprazole
    - a. Strongly agree
    - b. Agree somewhat
    - c. Not sure
    - d. Disagree somewhat
    - e. Strongly disagree
-

*The following case scenario applies to questions 11-13:*

**Imagine that you are a patient who got pharmacogenomic testing for a pain medication, codeine.**

11. What could the pharmacogenomic test result tell you about this medication?
  - a. Whether I will need a different dose of codeine or a different medication for pain relief
  - b. Whether I will become addicted to codeine
  - c. Whether I will have nausea and vomiting when using codeine
  - d. Pharmacogenomic testing is irrelevant to codeine
  - e. I don't know
  
12. Based on your test results for codeine, which of the following medications may not be an appropriate alternative for the treatment of your pain?
  - a. Aspirin
  - b. Oxycodone
  - c. Tylenol
  - d. None of these medications would be affected
  - e. I don't know
  
13. Based on my current knowledge, I wish my doctor had pharmacogenomic information before prescribing codeine
  - a. Strongly agree
  - b. Agree somewhat
  - c. Not sure
  - d. Disagree somewhat
  - e. Strongly disagree

---

*The following case scenario applies to questions 14-16:*

**Imagine that you are a patient who got pharmacogenomic testing for a cholesterol medication, simvastatin.**

14. What could the pharmacogenomic test result tell you about this medication?
  - a. Whether I will have a rash when using simvastatin
  - b. Whether I will have heartburn when using simvastatin
  - c. Whether I will have muscle pain when using simvastatin
  - d. Pharmacogenomic testing is irrelevant to simvastatin
  - e. I don't know
  
15. Based on your test results for simvastatin, what would you do next?
  - a. Call my doctor and discuss with him/her my concerns
  - b. Stop taking simvastatin on my own
  - c. Take a lower dose of simvastatin
  - d. Start taking a different over-the-counter medication
  - e. I don't know

16. Based on my current knowledge, I wish my doctor had pharmacogenomic information before prescribing simvastatin
- Strongly agree
  - Agree somewhat
  - Not sure
  - Disagree somewhat
  - Strongly disagree

---

*The following case scenario applies to questions 17-19:*

**Imagine that you are a patient who got pharmacogenomic testing for a medication to prevent blood clots called clopidogrel.**

17. What could your pharmacogenomic test result tell you about this medication?
- Whether I will be allergic to clopidogrel
  - Whether I will have nausea and vomiting when using clopidogrel
  - Whether clopidogrel is an effective medication for me to prevent blood clots
  - Pharmacogenomic testing is irrelevant to clopidogrel
  - I don't know
18. Based on your test results for clopidogrel, what medication(s) could be good alternative(s) for you to prevent blood clots?
- Prasugrel
  - Ticagrelor
  - Both prasugrel and ticagrelor are good alternatives for me
  - None of these medications would be good alternatives for me
  - I don't know
19. Based on my current knowledge, I wish my doctor had pharmacogenomic information before prescribing clopidogrel
- Strongly agree
  - Agree somewhat
  - Not sure
  - Disagree somewhat
  - Strongly disagree

## Post-Test Questionnaire

Q#: \_\_\_\_\_

Year of birth: \_\_\_\_\_

1. Factors that can affect how a person responds to a medication include:
  - a. Age
  - b. Sex
  - c. Lifestyle
  - d. Genetics
  - e. Other drugs
  - f. All of the above
  - g. I don't know
  
2. Your DNA is passed down from:
  - a. Your mother
  - b. Your father
  - c. Both your mother and your father
  - d. Neither your mother nor your father
  - e. I don't know
  
3. Your DNA contains instructions for:
  - a. The color of your eyes
  - b. Your blood type
  - c. How you respond to medications
  - d. All of the above
  - e. I don't know
  
4. Pharmacogenomics is the study of:
  - a. Drug side effects
  - b. How your DNA affect your responses to medications
  - c. How medications can change your DNA
  - d. How drugs are prescribed
  - e. I don't know
  
5. Pharmacogenomic testing can:
  - a. Help find the most effective medication
  - b. Help avoid side effects
  - c. Help find the best dose of a medication
  - d. All of the above
  - e. I don't know
  
6. It is important that I can control who has access to my genetic information

- f. Strongly agree
  - g. Agree
  - h. Neutral
  - i. Disagree
  - j. Strongly disagree
7. If I have access to my pharmacogenomic test results, I would share my results with (**circle all that apply**):
- a. Healthcare provider
  - b. Pharmacist
  - c. Spouse/partner
  - d. Parents
  - e. Siblings
  - f. Children
  - g. Friends
  - h. Social media
  - i. Others (please specify):
  - j. I would not share my results
8. If I have access to my pharmacogenomic test results, I would encourage a friend or family member to consider getting pharmacogenomic testing:
- a. Strongly agree
  - b. Agree
  - c. Neutral
  - d. Disagree
  - e. Strongly disagree
- 

*The following case scenario applies to questions 9-10:*

**Imagine that you are a patient who got pharmacogenomic testing for an acid reflux medication, omeprazole.**

9. What could the pharmacogenomic test result tell you about this medication?
- a. Whether I will experience nausea and vomiting when using omeprazole
  - b. Whether omeprazole will be an effective medication for me to treat acid reflux
  - c. Whether I will be allergic to omeprazole
  - d. Pharmacogenomic testing is irrelevant to omeprazole
  - e. I don't know
10. Based on my current knowledge, I wish my doctor had pharmacogenomic information before prescribing omeprazole
- a. Strongly agree
  - b. Agree somewhat
  - c. Not sure
  - d. Disagree somewhat
  - e. Strongly disagree
- 

*The following case scenario applies to questions 11-13:*

**Imagine that you are a patient who got pharmacogenomic testing for a pain medication, codeine.**

11. What could the pharmacogenomic test result tell you about this medication?
  - a. Whether I will need a different dose of codeine or a different medication for pain relief
  - b. Whether I will become addicted to codeine
  - c. Whether I will have nausea and vomiting when using codeine
  - d. Pharmacogenomic testing is irrelevant to codeine
  - e. I don't know
  
12. Based on your test results for codeine, which of the following medications may not be an appropriate alternative for the treatment of your pain?
  - a. Aspirin
  - b. Oxycodone
  - c. Tylenol
  - d. None of these medications would be affected
  - e. I don't know
  
13. Based on my current knowledge, I wish my doctor had pharmacogenomic information before prescribing codeine
  - a. Strongly agree
  - b. Agree somewhat
  - c. Not sure
  - d. Disagree somewhat
  - e. Strongly disagree

---

*The following case scenario applies to questions 14-16:*

**Imagine that you are a patient who got pharmacogenomic testing for a cholesterol medication, simvastatin.**

14. What could the pharmacogenomic test result tell you about this medication?
  - a. Whether I will have a rash when using simvastatin
  - b. Whether I will have heartburn when using simvastatin
  - c. Whether I will have muscle pain when using simvastatin
  - d. Pharmacogenomic testing is irrelevant to simvastatin
  - e. I don't know
  
15. Based on your test results for simvastatin, what would you do next?
  - a. Call my doctor and discuss with him/her my concerns
  - b. Stop taking simvastatin on my own
  - c. Take a lower dose of simvastatin
  - d. Start taking a different over-the-counter medication
  - e. I don't know

16. Based on my current knowledge, I wish my doctor had pharmacogenomic information before prescribing simvastatin
- Strongly agree
  - Agree somewhat
  - Not sure
  - Disagree somewhat
  - Strongly disagree
- 

*The following case scenario applies to questions 17-19:*

**Imagine that you are a patient who got pharmacogenomic testing for a medication to prevent blood clots called clopidogrel.**

17. What could your pharmacogenomic test result tell you about this medication?
- Whether I will be allergic to clopidogrel
  - Whether I will have nausea and vomiting when using clopidogrel
  - Whether clopidogrel is an effective medication for me to prevent blood clots
  - Pharmacogenomic testing is irrelevant to clopidogrel
  - I don't know
18. Based on your test results for clopidogrel, what medication(s) could be good alternative(s) for you to prevent blood clots?
- Prasugrel
  - Ticagrelor
  - Both prasugrel and ticagrelor are good alternatives for me
  - None of these medications would be good alternatives for me
  - I don't know
19. Based on my current knowledge, I wish my doctor had pharmacogenomic information before prescribing clopidogrel
- Strongly agree
  - Agree somewhat
  - Not sure
  - Disagree somewhat
  - Strongly disagree
-



## **Usability and understandability of the patient portal**

1. The patient portal was easy for me to use
  - a. Strongly agree
  - b. Agree somewhat
  - c. Not sure
  - d. Disagree somewhat
  - e. Strongly disagree
  
2. The patient portal contained a lot of technical or complicated words I did not understand
  - a. Strongly agree
  - b. Agree somewhat
  - c. Not sure
  - d. Disagree somewhat
  - e. Strongly disagree
  
3. I had enough time to evaluate the contents of the patient portal
  - a. Strongly agree
  - b. Agree somewhat
  - c. Not sure
  - d. Disagree somewhat
  - e. Strongly disagree
